# Supplementary material for: Prevalence of Depression in Ankylosing Spondylitis: A Systematic Review and Meta-Analysis
Source: PubMed Central journal article supplement — Psychiatry Investig. 2019 Aug 21;16(8):565–74. doi: 10.30773/pi.2019.06.05 (PMC6710421; doi:10.30773/pi.2019.06.05), 2019-08-21
Supplement: pi-2019-06-05-suppl1.pdf [file pi-2019-06-05-suppl1.pdf]

## **SUPPLEMENTARY MATERIAL 1**

### **Search Terms**

Embase/PsyINFO/Web of Science/PubMed/ Cochrane Library

(depress\* or depress\* disorder\$ or affective disorder\$ or mood disorder\$ or adjustment disorder\$ or affective symptom\$ or dysthymi\*) AND (Ankylosing spondylitis or AS)
