# Supplementary material for: Prevalence of Depression in Ankylosing Spondylitis: A Systematic Review and Meta-Analysis
Source: PubMed Central journal article supplement — Psychiatry Investig. 2019 Aug 21;16(8):565–74. doi: 10.30773/pi.2019.06.05 (PMC6710421; doi:10.30773/pi.2019.06.05), 2019-08-21
Supplement: pi-2019-06-05-suppl2.pdf [file pi-2019-06-05-suppl2.pdf]

## SUPPLEMENTARY MATERIAL 2

### Results of the Literature Search

1. Aissaoui N, Rostom S, Hakkou J, Berrada Ghziouel K, Bahiri R, Abouqal R, et al. Fatigue in patients with ankylosing spondylitis: prevalence and relationships with disease-specific variables, psychological status, and sleep disturbance. *Rheumatol Int* 2012;32:2117-2124.
2. Altan L, Bingol U, Saranodol A, Asian M, Eican I, Yurtkuran M. Anxiety and depression in ankylosing spondylitis patients. *J Rheumatol Med Rehabil* 2003;14:221-227.
3. Anyfanti P, Gavriilaki E, Pyrpasopoulou A, Triantafyllou G, Triantafyllou A, Chatzimichailidou S, et al. Depression, anxiety, and quality of life in a large cohort of patients with rheumatic diseases: common, yet undertreated. *Clin Rheumatol* 2016;35:733-739.
4. Arisoy O, Bes C, Cifci C, Sercan M, Soy M. The effect of TNF-alpha blockers on psychometric measures in ankylosing spondylitis patients: a preliminary observation. *Rheumatol Int* 2013;33:1855-1864.
5. Aydin T, Taspinar O, Sariyildiz MA, Guneser M, Keskin Y, Canbaz N, et al. Evaluation of the effectiveness of home based or hospital based calisthenic exercises in patients with ankylosing spondylitis. *J Back Musculoskelet Rehabil* 2016;29:723-730.
6. Baysal O, Durmus B, Ersoy Y, Altay Z, Senel K, Nas K, et al. Relationship between psychological status and disease activity and quality of life in ankylosing spondylitis. *Rheumatol Int* 2011;31:795-800.
7. Cakar E, Dincer U, Kiralp MZ, Taskaynatan MA, Yasar E, Bayman EO, et al. Sexual problems in male ankylosing spondylitis patients: relationship with functionality, disease activity, quality of life, and emotional status. *Clin Rheumatol* 2007;26:1607-1613.
8. Cooksey R, Brophy S, Dennis M, Davies H, Atkinson M, Irvine E, et al. Severe flare as a predictor of poor outcome in ankylosing spondylitis: a cohort study using questionnaire and routine data linkage. *Rheumatology* 2015;54:1563-1572.
9. Demir SE, Rezvani A, Ok S. Assessment of sexual functions in female patients with ankylosing spondylitis compared with healthy controls. *Rheumatol Int* 2013;33:57-63.
10. Dhakad U, Singh BP, Das SK, Wakhlu A, Kumar P, Srivastava D, et al. Sexual dysfunctions and lower urinary tract symptoms in ankylosing spondylitis. *Int J Rheum Dis* 2015;18:866-872.
11. Dincer U, Cakar E, Kiralp MZ, Dursun H. Assessment of sexual dysfunction in male patients with Ankylosing Spondylitis. *Rheumatol Int* 2007;27:561-566.
12. Durmus D, Sarisoy G, Alayli G, Kesmen H, Çetin E, Bilgici A, et al. Psychiatric symptoms in ankylosing spondylitis: their relationship with disease activity, functional capacity, pain and fatigue. *Compr Psychiatry* 2015;62:170-177.
13. Ersozlu-Bozkirli ED, Keskek SO, Bozkirli E, Yucel AE. The effect of infliximab on depressive symptoms in patients with ankylosing spondylitis. *Acta Reumatol Port* 2015;40:262-267.
14. Ertenli I, Ozer S, Kiraz S, Apras SB, Akdogan A, Karadag O, et al. Infliximab, a TNF-alpha antagonist treatment in patients with ankylosing spondylitis: the impact on depression, anxiety and quality of life level. *Rheumatol Int* 2012;32:323-330.
15. Fallahi S, Jamshidi AR, Bidad K, Qorbani M, Mahmoudi M. Evaluating the reliability of Persian version of ankylosing spondylitis quality of life (ASQoL) questionnaire and related clinical and demographic parameters in patients with ankylosing spondylitis. *Rheumatol Int* 2014;34:803-809.
16. Günaydin R, Göksel Karatepe A, Çeşmeli N, Kaya T. Fatigue in patients with ankylosing spondylitis: relationships with disease-specific variables, depression, and sleep disturbance. *Clin Rheumatol* 2009;28:1045-1051.
17. Hakkou J, Rostom S, Aissaoui N, Berrada KR, Abouqal R, Bahiri R, et al. Psychological status in Moroccan patients with Ankylosing Spondylitis and its relationships with disease parameters and quality of life. *J Clin Rheumatol* 2011;17:424-428.
18. Healey EL, Haywood KL, Jordan KP, Garratt AM, Ryan S, Packham JC. Ankylosing spondylitis and its impact on sexual relationships. *Rheumatology* 2009;48:1378-1381.
19. Hyphantis T, Kotsis K, Tsifetaki N, Creed F, Drosos AA, Carvalho AF, et al. The relationship between depressive symptoms, illness perceptions and quality of life in ankylosing spondylitis in comparison to rheumatoid arthritis. *Clin Rheumatol* 2013;32:635-644.
20. Jiang YT, Yang MC, Wu HS, Song H, Zhan F, Liu SY, et al. The relationship between disease activity measured by the BASDAI and psychological status, stressful life events, and sleep quality in ankylosing spondylitis. *Clin Rheumatol* 2015;34:503-510.
21. Li Y, Zhang SL, Zhu J, Du XN, Huang F. Sleep disturbances are associated with increased pain, disease activity, depression, and anxiety in ankylosing spondylitis: a case-control study. *Arthritis Res Ther* 2012;14:R215.
22. Lian XF, Tang YQ, Zhang C. The investigation of depression in 60 ankylosing spondylitis patients. *Nurs J Chin People Liberat Army* 2003;20:39-40.
23. Martindale J, Smith J, Sutton CJ, Grennan D, Goodacre L, Goodacre JA. Disease and psychological status in ankylosing spondylitis. *Rheumatology* 2006;45:1288-1293.
24. Meesters JJ, Bremander A, Bergman S, Petersson IF, Turkiewicz A, Englund M. The risk for depression in patients with ankylosing spondylitis: a population-based cohort study. *Arthritis Res Ther* 2014;16:418.
25. Ortancil O, Konuk N, May H, Sanli A, Ozturk D, Ankarali H. Psychological status and patient-assessed health instruments in ankylosing spondylitis. *J Clin Rheumatol* 2010;16:313-316.
26. Ozkorumak E, Karkucak M, Civil F, Tiryaki A, Ozden G. Sexual function in male patients with ankylosing spondylitis. *Int J Impot Res* 2011;23:262-267.
27. Rodriguez-Lozano C, Gantes MA, Gonzalez B, Hernandez-Beriai JA, Naranjo A, Hernandez V, et al. Patient-acceptable symptom state as an outcome measure in the daily care of patients with Ankylosing Spondylitis. *J Rheumatol* 2012;39:1424-1432.
28. Rostom S, Mengat M, Mawani N, Jinane H, Bahiri R, Hajjaj-Hassouni N. Sexual activity in Moroccan men with ankylosing spondylitis. *Rheumatol Int* 2013;33:1469-1474.
29. Schneeburger EE, Marengo MF, Dal Pra F, Maldonado Cocco JA, Citera G. Fatigue assessment and its impact in the quality of life of patients with ankylosing spondylitis. *Clin Rheumatol* 2015;34:497-501.
30. Shen CC, Hu LY, Yang AC, Kuo BI, Chiang YY, Tsai SJ. Risk of psychiatric disorders following Ankylosing Spondylitis: a nationwide population-based retrospective cohort study. *J Rheumatol* 2016;43:625-631.
31. Xu X, Shen B, Zhang A, Liu J, Da Z, Liu H, et al. Anxiety and depression correlate with disease and quality-of-life parameters in Chinese patients with ankylosing spondylitis. *Patient Prefer Adherence* 2016;10:879-885.
