# Supplementary material for: Prevalence of Depression in Ankylosing Spondylitis: A Systematic Review and Meta-Analysis
Source: PubMed Central journal article supplement — Psychiatry Investig. 2019 Aug 21;16(8):565–74. doi: 10.30773/pi.2019.06.05 (PMC6710421; doi:10.30773/pi.2019.06.05), 2019-08-21
Supplement: pi-2019-06-05-suppl3.pdf [file pi-2019-06-05-suppl3.pdf]

**Supplementary Table 1.** Results of newcastle-ottawa risk of bias assessment

| Study ID              | Representativeness | Size | Comparability | Outcome | Statistics | Total |
|-----------------------|--------------------|------|---------------|---------|------------|-------|
| Aissaoui 2012         | 0                  | 0    | 0             | 1       | 1          | 2     |
| Altan 2003            | 0                  | 0    | 0             | 1       | 0          | 1     |
| Anyfanti 2012         | 0                  | 0    | 0             | 1       | 0          | 1     |
| Arisoy 2013           | 0                  | 0    | 0             | 1       | 1          | 2     |
| Aydın 2016            | 0                  | 0    | 1             | 1       | 1          | 3     |
| Baysal 2011           | 0                  | 1    | 0             | 1       | 1          | 3     |
| Cakar 2007            | 0                  | 0    | 0             | 1       | 1          | 2     |
| Cooksey 2015          | 0                  | 1    | 1             | 1       | 1          | 4     |
| Demir 2013            | 0                  | 0    | 0             | 1       | 1          | 2     |
| Dhakad 2015           | 0                  | 0    | 0             | 1       | 1          | 2     |
| Dincer 2007           | 0                  | 0    | 0             | 1       | 0          | 1     |
| Durmus 2015           | 0                  | 0    | 0             | 1       | 1          | 2     |
| Ertenli 2012          | 0                  | 0    | 0             | 1       | 1          | 2     |
| Ersözlü-Bozkırlı 2015 | 0                  | 0    | 0             | 1       | 1          | 2     |
| Fallahi 2014          | 0                  | 0    | 0             | 1       | 1          | 2     |
| Günaydin 2009         | 0                  | 0    | 0             | 1       | 1          | 2     |
| Hakkou 2011           | 0                  | 0    | 0             | 1       | 1          | 2     |
| Healey 2009           | 1                  | 1    | 1             | 1       | 1          | 5     |
| Hyphantis 2013        | 0                  | 0    | 0             | 1       | 1          | 2     |
| Jiang 2015            | 1                  | 1    | 0             | 1       | 1          | 4     |
| Li 2013               | 0                  | 1    | 1             | 1       | 1          | 4     |
| Lian 2003             | 0                  | 0    | 0             | 1       | 1          | 2     |
| Martindale 2006       | 0                  | 0    | 1             | 1       | 1          | 3     |
| Meesters 2014         | 1                  | 1    | 0             | 1       | 0          | 3     |
| Ortancil 2010         | 0                  | 0    | 0             | 1       | 1          | 2     |
| Ozkorumak 2011        | 0                  | 0    | 0             | 1       | 1          | 2     |
| Rodríguez-Lozano 2012 | 0                  | 0    | 0             | 1       | 1          | 2     |
| Rostom 2013           | 0                  | 0    | 1             | 1       | 1          | 3     |
| Schneeberger 2015     | 0                  | 0    | 0             | 1       | 1          | 2     |
| Shen 2016             | 1                  | 1    | 0             | 1       | 0          | 3     |
| Xu 2016               | 0                  | 0    | 1             | 1       | 0          | 2     |
