# Supplementary figures and images for: Prevalence of Depression in Ankylosing Spondylitis: A Systematic Review and Meta-Analysis
Source: PubMed Central journal article supplement — Psychiatry Investig. 2019 Aug 21;16(8):565–74. doi: 10.30773/pi.2019.06.05 (PMC6710421; doi:10.30773/pi.2019.06.05), 2019-08-21

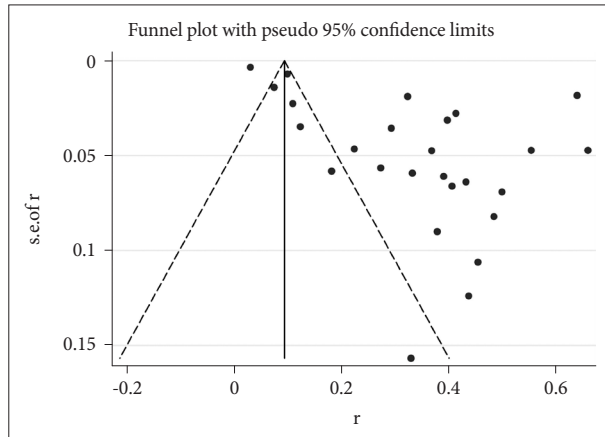

**Supplementary Figure 1.** Assessment of publication bias.

Supplement: pi-2019-06-05-suppl4.pdf [file pi-2019-06-05-suppl4.pdf]
